1 **Horizontal gene transfer of the *pirAB* genes responsible for Acute**  
2 **Hepatopancreatic Necrosis Disease (AHPND) turns a non-*Vibrio***  
3 **strain into an AHPND-positive pathogen**

4 Sarmila Muthukrishnan<sup>1¶</sup>, Tom Defoirdt<sup>4¶</sup>, Mohamed Shariff<sup>2&</sup>, Ina-Salwany M. Y<sup>1,2&</sup>,  
5 Fatimah Md Yusoff<sup>1,3&</sup>, I. Natrah<sup>1,2,3¶\*</sup>

6  
7 <sup>1</sup> Department of Aquaculture, Faculty of Agriculture, Universiti Putra Malaysia, 43400 UPM,  
8 Serdang Selangor

9 <sup>2</sup> Laboratory of Marine Biotechnology, Institute Bioscience, Universiti Putra Malaysia, 43400  
10 UPM, Selangor

11 <sup>3</sup> International Institute of Aquaculture and Aquatic Sciences, Universiti Putra Malaysia, 43400  
12 UPM, Serdang, Selangor.

13 <sup>4</sup>Center for Microbial Ecology and Technology, Ghent University, Coupure Links 653, 9000  
14 Gent, Belgium

15

16 *\*Corresponding address:*

17 Natrah Ikhsan PhD (I. Natrah)

18 Department of Aquaculture

19 Faculty of Agriculture

20 Universiti Putra Malaysia

21 43400 Serdang

22 Selangor, MALAYSIA

23 Email: [natrah@upm.edu.my](mailto:natrah@upm.edu.my)

24 Tel: +603-8947 4972

25 Fax: +603-8940 8311

26

27 ¶ These authors contributed equally to this work.

28 &These authors also contributed equally to this work.

29

30 Running head: Horizontal Gene Transfer of AHPND causing virulence genes

31

32

### 33 **Abstract**

34 In the past decade, shrimp farms, particularly those established in Asia, Mexico and  
35 South America suffered from the outbreak of an emergent penaeid shrimp disease known as  
36 Acute Hepatopancreatic Necrosis Disease (AHPND). The PirA and PirB toxins produced by  
37 plasmid pVA1 in *Vibrio parahaemolyticus* were reported to cause the AHPND pathology. More  
38 recent research demonstrated that *V. parahaemolyticus* is not the only species that can cause  
39 AHPND, as other *Vibrio* species were also found to contain PirAB-containing plasmid. The  
40 present study assessed the Horizontal Gene Transfer (HGT) of AHPND that transforms genes  
41 (*pirA* and *pirB*) from AHPND positive *V. parahaemolyticus* to non-AHPND and non-vibrio  
42 species identified as *Algoriphagus* sp. strain NBP. The HGT of *pirA* and *pirB* genes from the  
43 AHPND positive *V. parahaemolyticus* to *Algoriphagus* sp. strain NBP was found to occur at  
44 different temperatures. The conjugation efficiency rate (n°) of *pirAB* from *V. parahaemolyticus*  
45 to *Algoriphagus* sp. strain NBP at 30°C and 40°C showed 80-91% efficiency. Shrimp

46 challenged with the *pirA* and *pirB* positive *Algoriphagus* sp. strain NBP also demonstrated  
47 typical pathognomonic AHPND lesions during the histopathologic examination.

48

#### 49 **Author summary**

50 AHPND is a significant threat to the shrimp industry leading to high losses. The results  
51 demonstrated that the conjugative transfer of the *pirA* and *pirB* positive *V. parahaemolyticus*  
52 (donor strain) to a non-*Vibrio* and non-pathogenic bacterium (recipient strain), successfully  
53 transformed the non-pathogenic bacterium into a disease-causing strain with a disease-causing  
54 capability similar to the donor strain. Initially, *V. parahaemolyticus* that express the PirA and  
55 PirB toxins which encoded by a conjugative plasmid cause sloughing and degeneration of  
56 shrimp hepatopancreatic.

57

58

59

60

61

62

63

64

65

## 66 Introduction

67 It has been a decade since the emergence of Acute Hepatopancreatic Necrosis Disease  
68 (AHPND) that has caused global losses of more than \$ 1 billion per year, and mortality rates  
69 up to 100% in the shrimp farming industries within the regions of Asia, Mexico, South America  
70 and Texas [1-2]. The etiological agent has been initially identified as *Vibrio parahaemolyticus*  
71 carrying a plasmid containing toxin genes (*pirA* and *pirB*). The two toxin subunits, PirA and  
72 PirB, are homologous to the Pir (*Photorhabdus* insect-related) binary toxin. Recent studies have  
73 reported that other vibrios that are closely related to *Vibrio parahaemolyticus*, such as *Vibrio*  
74 *campbellii* from Vietnam [3], *Vibrio owensii* from China [4], *Vibrio campbellii* from China [5],  
75 *Vibrio punensis* from South America [6] and *Vibrio harveyi* from Malaysia [7] also  
76 demonstrated AHPND pathology in shrimp. The presence of conjugative transfer genes on the  
77 pVA1 plasmid (70 kb plasmid harboring the *pirA* and *pirB* genes) [8] postulates the possibility  
78 of mobilisation of AHPND virulence genes to other *Vibrio* spp. via horizontal gene transfer [9].  
79 The presence of both *pirA* and *pirB* genes in other *Vibrio* spp. suggested that the toxin genes  
80 are transmissible through conjugal transfer, thereby turning the acceptor bacterium into an  
81 AHPND-causing strain [8]. This has significant implications for disease management, as the  
82 presence of non-pathogenic *Vibrio* strains that are closely related to *Vibrio parahaemolyticus*  
83 also includes risk as these bacteria might be transformed into pathogens through horizontal gene  
84 transfer. Indeed, *pirA* and *pirB* genes have been well characterised in many *Vibrio* spp. with  
85 AHPND-like histopathology [3, 5, 7]. Thus far, all *pirA* and *pirB* positive strains which causes  
86 AHPND belong to species within the Harveyi clade of vibrios (i.e. a clade of species closely  
87 related to *V. harveyi*) [3-7]. However, very little is known on the possibility of conjugative  
88 transfer of these genes to non-*Vibrio* spp. Such a gene transfer would have far-reaching  
89 implications for disease control as it would be able to also turn non-*Vibrio* strains into AHPND-

90 causing agents. In order to investigate potential horizontal gene transfer of the *pirA* and *pirB*  
91 genes from *V. parahaemolyticus* to a non-AHPND and non-*Vibrio* bacterium, we assessed  
92 transfer of the genes to an *Algoriphagus* sp. strain NBP isolated from marine microalgae  
93 (*Nannochloropsis* sp.).

94

## 95 **Results**

### 96 **Isolation and of a *pirAB* negative non-*Vibrio* strain from a microalgal culture**

97 Eight strains were isolated from the microalgal culture. An isolate with a pink colony and  
98 creamy texture on MA plates, denoted NBP, was selected for further work as this colony  
99 morphology enabled us to easily differentiate the isolate from *Vibrio parahaemolyticus*  
100 BpShHep31 (**Fig 1**). The selected isolate was confirmed to be negative for the *pirA* and *pirB*  
101 genes using PCR with specific primers (VpPirA-284F, VpPirA-284R, VpPirB-392F, and  
102 VpPirB-392R).

103

### 104 **Identification of the *pirAB* negative isolate**

105 A BLAST search revealed that the 16S rDNA gene sequence of isolate NBP showed 99%  
106 similarity to that of *A. marincola* strain SW-2 (GenBank accession **MK583623**). The 16S rDNA  
107 of the isolate formed a monophyletic taxon with *A. marincola* strain SW-2 with a posterior  
108 probability (PP = 0.67) (**Fig 2**). Hence, the isolate is further denoted as *Algoriphagus* sp. strain  
109 NBP. The 16S rDNA sequence from strain NBP has been submitted to GenBank under  
110 accession number **MK583623**.

111

112 **Co-culture of isolate NBP and *V. parahaemolyticus* BpShHep31 and screening for the**  
113 **presence of *pirAB* genes in colonies re-isolated after co-culture**

114 The results showed that although *Algoriphagus* sp. strain NBP was negative for *pirA* and *pirB*  
115 prior to co-culture, several colonies of the isolate that were picked up from MA plates after co-  
116 culture with *Vibrio parahaemolyticus* BpShHep31 tested positive for the presence of *pirA* and  
117 *pirB* (**Fig 3**). Both *PirA* (GenBank accession no. **MN652913**) and *PirB* (GenBank accession  
118 no. **MN652914**) sequences from *Algoriphagus* sp. strain NBP demonstrated 99% similarities  
119 when compared to *pirAB* genes from *V. parahaemolyticus* BpShHep31.

120

121 The density of *Algoriphagus* sp. strain NBP in the cocultures significantly increased ( $P < 0.05$ )  
122 at higher temperature (**Fig 4**). The *Algoriphagus* sp. strain NBP colonies isolated from the  
123 cocultures were subjected to screening for the presence of *V. parahaemolyticus toxR* in order  
124 to exclude contamination with *V. parahaemolyticus*. The results demonstrated that 90-92 % of  
125 the *Algoriphagus* sp. strain NBP colonies were negative for *toxR*, indicating that the  
126 contamination of *Algoriphagus* sp. strain NBP colonies with *V. parahaemolyticus* was less than  
127 10%. Furthermore, the *Algoriphagus* sp. strain NBP incubated in the MB overnight and plated  
128 on TCBS showed no growth indicating the absence of *V. parahaemolyticus*.

129

130 We calculated the conjugation efficiency of *pirAB* genes and found that it was high (80-81%)  
131 at 30°C and 40°C (**Table 1**). Furthermore, no significant differences ( $P > 0.05$ ) were observed  
132 between the conjugation efficiency of *pirAB* at 30-40°C.

133

134 **Table 1. Conjugation efficiency of the *pirA* and *pirB* genes from *V. parahaemolyticus* to**  
135 ***Algoriphagus* sp. strain NBP.**

| <i>Temperature</i> (°C) | <i>Conjugation efficiency</i> (%) |                     |
|-------------------------|-----------------------------------|---------------------|
|                         | <i>pirA</i>                       | <i>pirB</i>         |
| 20                      | 68 ± 4 <sup>a</sup>               | 58 ± 7 <sup>a</sup> |
| 30                      | 81 ± 10 <sup>b</sup>              | 72 ± 4 <sup>b</sup> |
| 40                      | 80 ± 8 <sup>b</sup>               | 80 ± 9 <sup>b</sup> |

136 <sup>ab</sup> Mean value (mean ± SD) with different superscript letters are significantly different ( $P < 0.05$ )

137

138 **Shrimp immersion challenge with the *pirAB* positive *Algoriphagus* sp. strain NBP**

139 The pathogenicity of the *pirA* and *pirB* positive *Algoriphagus* sp. strain NBP was investigated  
140 through an *in vivo* immersion assay using *P. vannamei*. Shrimp cultures that were inoculated  
141 with the *pirA* and *pirB* positive *Algoriphagus* sp. strain NBP showed significant ( $P < 0.05$ )  
142 mortality when compared to unchallenged control cultures, whereas shrimp cultures that were  
143 challenged with the *pirA* and *pirB* negative *Algoriphagus* sp. strain NBP showed no significant  
144 mortality (**Fig 5**). Additionally, the shrimp challenged with *pirA* and *pirB* positive *Algoriphagus*  
145 sp. strain NBP demonstrated pale hepatopancreas, lethargy and lack of appetite.

146

147 The shrimp challenged with *pirA* and *pirB* positive *Algoriphagus* sp. strain NBP demonstrated  
148 typical AHPND pathology on the 14<sup>th</sup> day. Histopathologic evaluation revealed detachment of  
149 epithelial cells from the membrane up to lumen (see Fig **6A**), which affected the integrity of the  
150 tubules. Loose hepatopancrease, tubule atrophy, as well as lack of B, R and F cells, were  
151 observed (see Fig **6B**). The formation of hemocytic encapsulation and the massive sloughed  
152 hepatopancrease can be noted in Figs **6C** and **6D**. Overall, the typical pathognomonic AHPND

153 lesions were observed in shrimp challenged with the *pirA* and *pirB* positive *Algoriphagus* sp.  
154 strain NBP. Expected *pirA* and *pirB* amplicons were also generated from DNA extracts of  
155 shrimp challenged with NBP *pirAB*<sup>+</sup>, whereas samples taken from unchallenged shrimp and  
156 shrimp challenged with NBP *pirAB*<sup>-</sup> tested negative.

157

## 158 **Discussion**

159 The *V. parahaemolyticus* strain BpShHep31 used in this study were previously isolated from  
160 diseased *P. vannamei* [7] and were tested positive for *pirAB* genes using VpPirA and VpPirB  
161 primer sets [10]. Many studies conducted HGT experiment using mutant strains to determine  
162 the conjugation activity and efficiency [11-13]. In this study, we tested on phenotypically  
163 different bacterium isolated from marine microalga *Nannochloropsis* sp. which was previously  
164 isolated from a shrimp pond.

165

166 The possibility of AHPND toxin genes to spread via conjugation and permanently be inheritable  
167 in the recipient bacteria has been highlighted by Lee et al. [8]. The previous study demonstrated  
168 that *V. parahaemolyticus* strain M2-36 contain gene fragments that are flanked by transposase  
169 coding sequence, which is also known as mobile genetic elements (MGEs). The presence of  
170 MGEs in *V. parahaemolyticus* strain M2-36 suggested the acquisition or deletion of *PirA* and  
171 *PirB* might be due to HGT [8]. Hence, to prove that HGT could also occur between a *Vibrio*  
172 and a *non-Vibrio* strain, a co-culture experiment between AHPND positive *Vibrio*  
173 *parahaemolyticus* BpShHep31 with a non-AHPND and non-vibrio bacterium identified as  
174 *Algorhipagus* sp. strain NBP was conducted. In this study, three different temperatures were  
175 evaluated to observe the impact of temperature on HGT among the different bacteria. The



176 results demonstrated that HGT occurred in all the three incubation temperatures (20 °C, 30 °C,  
177 and 40 °C) and time points (24 h, 48 h, and 72 h). The *V. parahaemolyticus* strain BpShHep31  
178 functioned as a donor by donating both *pirA* and *pirB* containing plasmid to genes to the  
179 recipient species (*Algorhipagus* sp. strain NBP) during the co-culture experiment. To the best  
180 of the authors' knowledge, this is the first study on the induction of *pirA* and *pirB* genes via  
181 HGT from AHPND *Vibrio* to a non-*Vibrio* strain.

182 Thus, to further investigate the expressions of *pirA* and *pirB* genes in the recipient cells, the  
183 successful recipient cells were sub-cultured in an *in vivo* challenge test. Interestingly, shrimp  
184 challenged with the recipient cells (*Algorhipagus* sp. strain NBP) carrying *pirA* and *pirB*  
185 virulence genes exhibited AHPND pathology and demonstrated significant mortalities ( $P <$   
186  $0.05$ ). However, *V. parahaemolyticus* strain BpShHep31 showed rapid mortalities in *P.*  
187 *vannamei* shrimp (50% mortalities within 2 days) [7] compared to the recipient cells  
188 (*Algorhipagus* sp. strain NBP) with the *pirAB* genes. Recent study also reported on the presence  
189 of *pirA*- and *pirB*- like genes in a non-vibrio *Micrococcus luteus* [14]. However, there is no data  
190 on the *in vivo* challenge test and the mechanism by which *Micrococcus luteus* obtained the  
191 *pirAB* genes.

192

193 Despite the genomic content in the plasmids of AHPND strains isolated from Asia, Mexico,  
194 and South America seemed to be distinct [10], all AHPND strains have been proven to carry a  
195 group of transposase-coding sequence linked to HGT [15]. Han et al [15] also discovered nine  
196 proteins in AHPND positive *Vibrio* spp., which were identical to proteins encoded with ORFs  
197 involved in plasmid conjugation and mobilisation. Besides, Dong et al., 2019 demonstrated the  
198 conjugation transfer of *pirAB* genes from *V. parahaemolyticus* strain Vp2S01 to non-AHPND  
199 *V. campbellii* with a transfer efficiency of  $2.6 \times 10^{-8}$  transconjugant/recipient. This study

200 demonstrated 80% of transfer efficiency from *V. parahaemolyticus* strain BpShHep31 to non-  
201 *Vibrio* recipient bacteria (*Algorhipagus* sp. strain NBP) at 30-40°C. This finding further justifies  
202 that both *pirA* and *pirB* genes could be transferred to the non-pathogenic and non-*Vibrio*  
203 recipient bacteria (*Algorhipagus* sp. strain NBP) through conjugation. The transfer of *pirA* and  
204 *pirB* genes from pathogenic bacteria to non-pathogenic bacteria may then contribute to the  
205 emergence of new AHPND strains.

206

207 In summary, the study data demonstrated that *pirA* and *pirB* genes can be easily transferred to  
208 other microbes (non-*Vibrio* bacteria). The study outcomes postulate the presence of multiple  
209 non-*Vibrio* species in the shrimp ponds with *pirA* and *pirB* genes. This study shows that future  
210 researches should also consider non-*Vibrio* bacteria for AHPND screening process. The rapid  
211 intraspecies and interspecies HGT of *pirA* and *pirB* genes increased the complication for  
212 identifying the causative agents of AHPND. This scenario catalyses our need to determine  
213 preventive and mitigation measures to curb the spread of these pathogenic genes. Furthermore,  
214 comprehending the mechanism of interspecies gene transfer between AHPND *Vibrios* and non-  
215 AHPND, non-*Vibrio* bacterium is indeed crucial in light of this shrimp pandemic.

216

## 217 **Methods**

### 218 **Bacterial strains and culture conditions**

219 Acute hepatopancreatic necrosis disease (AHPND)-positive *Vibrio parahaemolyticus* strain  
220 BpShHep31 [7] was used as a donor of the *pirAB* containing plasmid. Ten microliters of a  
221 stored culture of the strain in 40% glycerol at -80 °C were plated onto Marine Agar (MA)

222 (Difco™, USA) and incubated overnight at 28 °C. A single colony was picked from the plate  
223 and cultured in MB at 28 °C under constant agitation (150 rpm).

224

### 225 **Isolation of bacteria from *Nannochloropsis* sp.**

226 The marine green microalga *Nannochloropsis* sp. used in this study was obtained from  
227 Bioproduct Lab (BP), University of Putra Malaysia (UPM), Malaysia. The microalga was  
228 cultured in Guillard's f/2 medium at room temperature in 100 μmol of photons m<sup>-2</sup>s<sup>-1</sup> of light  
229 intensity and 30 ppm of salinity. One mL of the culture was transferred to a 1.5 ml Eppendorf  
230 tube and centrifuged at 3000 rpm for 5 minutes. Next, 100 μL of the supernatant was serially  
231 diluted using saline buffer and plated on MA. The plates were incubated overnight at 28 °C.  
232 Different colonies were picked based on their morphology, colour, and structure on the MA  
233 plates. The isolated colonies were sub-cultured twice on MA and were subsequently  
234 cryopreserved at -80 °C in Marine Broth (MB) (Difco™, USA) containing 40% of glycerol. A  
235 single isolate, denoted NBP, was selected for further experiments based on its colony  
236 morphology being clearly different from that of *Vibrio parahaemolyticus* BpShHep31 which  
237 thus enabled easy differentiation after co-culture experiments.

238

### 239 **Screening for the presence of *pirA* and *pirB* genes**

240 The presence of *pirA* and *pirB* genes was determined using PCR with specific primers.  
241 Genomic DNA was extracted from grown cultures using the Geneaid kit (Taiwan) and was  
242 purified by adhering to the protocol provided by the manufacturer. The primers used for PCR  
243 amplification of the *pir* genes are listed in **Table 2**. The PCR mixtures were composed of 5 μL  
244 PCR buffer (10 x), 0.75 μL MgCl<sub>2</sub> (50mM), 1 μL of dNTPs (10mM), 1.0 μL each forward and

245 reverse primers (10  $\mu$ M), 0.5  $\mu$ L *Taq* polymerase (5 U  $\mu$ L<sup>-1</sup>, Invitrogen, United States) and 5  $\mu$ L  
246 template DNA (50 ng  $\mu$ L<sup>-1</sup>) in a total volume of 50  $\mu$ L. The PCR amplifications were performed  
247 using a PCR thermocycler (Bio-Rad, USA). The amplified products were examined via agarose  
248 gel electrophoresis (1%) supplemented with Midori green (GC biotech, Netherlands) dye.

249

250 **Table 2. Primers used in this study**

251

| Primers     | Sequence                   | Type of screening | Size (bp) | References |
|-------------|----------------------------|-------------------|-----------|------------|
| AP3-(F)     | TGT AAG CGC CGT TTA ACT CA | <i>pirA</i>       | 336       | [16]       |
| AP3-(R)     | GTGGTAATAGATTGTACAGAA      |                   |           |            |
| Ap4 (F1)    | ATGAGTAACAATATAAAACATGAAAC | <i>pirA/B</i>     | 1269      | [17]       |
| AP4 (R2)    | ACGATTTTCGACGTTCCCCAA      |                   |           |            |
| AP4 (F2)    | TTGAGAATACGGGACGTGGG       | <i>pirA /B</i>    | 230       | [17]       |
| AP4 (R2)    | GTTAGTCATGTGAGCACCTTC      |                   |           |            |
| VpPirA (F)  | TGACTATTCTCACGATTGGACTG    | <i>pirA</i>       | 284       | [10]       |
| VpPirA (R)  | CACGACTAGCGCCATTGTTA       |                   |           |            |
| VpPirB (F)  | TGATGAAGTGATGGGTGCTC       | <i>pirB</i>       | 392       | [10]       |
| VpPirB (R)  | TGTAAGCGCCGTTTAACTCA       |                   |           |            |
| 27 (F)      | AGAGTTTGATCMTGGCTCAG       | 16S rRNA          | 1500      | [18]       |
| 1492 (R)    | GGTTACCTTGTTACGACTT        |                   |           |            |
| ToxR-Vp (F) | AGCC CGCTTTCTTCAGACTC      | <i>toxR</i>       | 399       | [20]       |
| ToxR-Vp(R)  | AACGAGTCTTCTGCATGGTG       |                   |           |            |

252

253 **Identification of strain NBP**

254 The isolate was identified based on sequencing of the 16S rRNA. The primers applied for PCR  
255 amplification are listed in **Table 2**. The PCR mixtures were composed of the same components

256 as mentioned above. The conditions for 16S rRNA gene amplification were (i) 4 min at 94 °C,  
257 (ii) 30 cycles of 1 min at 94 °C, (iii) 1 min 30 s at 53 °C, and (iv) 2 min at 72 °C. The amplified  
258 products were examined via agarose gel electrophoresis (1%) supplemented with Midori green  
259 (GC biotech, Netherlands) dye and were sequenced.

260

261 Bayesian analysis was performed separately for the 16S rRNA datasets using MrBayes (v3.2)  
262 [20]. A mixed model was employed for nucleotide substitutions to sample across the GTR  
263 model space. Heterogeneity rates across sites were modelled using gamma distribution. Three  
264 independent analyses with 4 Markov chains were run for 10 million generations for each data  
265 set, hence saving tree for every 1000 generations. The first 25% of the trees were removed as  
266 burn-in. The maximum clade credibility (MCC) tree of the sampled trees in Bayesian MCMC  
267 analysis and posterior probabilities (PP) of the clade have been summarised in TreeAnnotator  
268 [21]. Posterior probabilities exceeding 0.6 are represented. The evolutionary distances were  
269 computed by using the mixed model method and 0.2 nucleotide substitutions per site.

270

271 The electropherogram generated by automated DNA sequencer was read by BioEdit Sequence  
272 Alignment Editor v7.2.6.1 (<http://www.mbio.ncsu.edu/BioEdit/bioedit.html>) [22], wherein the  
273 sequences were carefully examined to detect missed calls and base spacing. The consensus  
274 sequences of the strains were compared with the corresponding sequences in GenBank database  
275 using Basic Local Alignment Search Tool program (BLAST;  
276 <http://www.ncbi.nlm.nih.gov/BLAST/Blast.cgi>). The dataset for 16S rDNA was aligned in  
277 MAFFT (v7.365) [23], and the aligned sequences were manually corrected via BioEdit.  
278 Characters that were aligned ambiguously had been excluded from the analysis. *Roseivirgo*  
279 *echinicomitans* strain KMM6058 (GenBank accession no. **NR043168**) was used as outgroup  
280 for 16S rDNA phylogeny.

281

## 282 **Co-culture of *V. parahaemolyticus* BpShHep31 and strain NBP**

283 *Vibrio parahaemolyticus* strain BpShHep31 (at  $2 \times 10^3$  CFU mL<sup>-1</sup>) and *Algoriphagus* sp. strain  
284 NBP (at  $2 \times 10^5$  CFU mL<sup>-1</sup>) were co-cultured (cell densities 1:100 ratio respectively) at three  
285 temperatures (20 °C, 30 °C, and 40 °C). Samples were taken after 24 h, 48 h, and 72 h of co-  
286 culture. Samples were serially diluted and 100 µL aliquots of the diluted samples (dilutions  $10^{-6}$   
287 to  $10^{-9}$ ) were plated on MA. The plates were incubated overnight at room temperature. Three  
288 colonies were picked based on their morphology and colony colour on the agar plate for  
289 screening of the presence of *pirA* and *pirB*. *Algoriphagus* sp. strain NBP colonies were re-  
290 identified after co-culture using 16S rDNA sequencing for further verification.

291

## 292 **Determination of conjugation efficiency of *pirAB* in *Algoriphagus* sp. strain NBP colonies** 293 **upon co-culture**

294 The *Algoriphagus* sp. NBP colonies that were picked after plating of the coculture with *V.*  
295 *parahaemolyticus* strain BpShHep31 were verified to be free from contamination by *V.*  
296 *parahaemolyticus* by performing PCR with specific primers for the *V. parahaemolyticus toxR*  
297 gene (which is absent in *Algoriphagus*) (**Table 2**). Sterile 10 µL pipette tip was used to pick the  
298 colonies to avoid any contamination. The DNA of the colonies were extracted by adding 10 µL  
299 of sterile distilled water followed by heating at 94°C for 5 minutes. Then, the samples were  
300 cooled at 4°C and centrifuged at 10,000 rpm for 5 minutes. The supernatant of the samples was  
301 transferred to another sterile 0.2 mL tube. The *Algoriphagus* sp. strain NBP colonies were  
302 screened for the presence of the *pirAB* genes using the VpPirA and VpPirB primers (**Table 2**).  
303 We then calculated the conjugation efficiency (%) as follows:

304 
$$\text{Conjugation efficiency (\%)} = \frac{\text{n}^\circ \text{ pirAB}^+ \text{ and toxR}^- \text{ NBP colonies}}{\text{total n}^\circ \text{ of toxR}^- \text{ NBP colonies}} \times 100$$

305 After the coculture, few colonies of *Algoriphagus* sp. strain NBP were picked from the plate  
306 and inoculated into MB and incubated overnight. Then, the culture was serially diluted and 100  
307  $\mu\text{L}$  of the aliquots of the diluted samples were plated on MA and thiosulfate citrate bile salts  
308 sucrose agar (TCBS).

309

### 310 **Shrimp challenge test**

311 Healthy *Penaeus vannamei* shrimps (approximately 0.5 gram) were acclimatised for a week.  
312 The shrimps (30 shrimps in each challenge test) were transferred individually to 5 L aquariums  
313 filled with 3 L of autoclaved seawater at 25 ‰,  $27 \pm 1^\circ\text{C}$ ,  $7.3 \pm 0.6 \text{ mg/L}$  dissolved oxygen, and  
314  $7.5 \pm 0.6 \text{ pH}$ . Hepatopancreases of 10 arbitrarily selected shrimps were dissected and screened  
315 to determine the presence of the *pirA* and *pirB* genes using the AP3, AP4, VpPirA and VpPirB  
316 primers (**Table 2**) prior to the challenge test. The isolate NBP was cultured overnight in MB  
317 for the challenge test. Hundred microlitres of the culture was spread on thiosulfate citrate bile  
318 salts sucrose agar (TCBS) to check for contamination of *V. parahaemolyticus* and incubated  
319 overnight at  $28^\circ\text{C}$ . Only the batch culture with negative growth on TCBS agar (used selectively  
320 to identify the presence of vibrios) and positive for *pirAB* screening used in this immersion  
321 challenge test. The immersion challenge test was carried out in triplicates through inoculation  
322 of  $10^6 \text{ CFU mL}^{-1}$  of bacteria as described earlier [24]. Control shrimps were not exposed to any  
323 added strain. The survival rate of the shrimps was recorded daily.

324 The study was conducted following the Code of Practice for Care and Use of Animals for  
325 Scientific Purposes, Universiti Putra Malaysia (UPM). The study was reviewed and approved

326 by the Institutional Animal Care and Use Committee (IACUC), Faculty of Veterinary  
327 Medicine, Universiti Putra Malaysia (UPM).

328

### 329 **Histopathological analysis and screening for the presence of *pirA* and *pirB* genes in** 330 **challenged shrimp**

331 Shrimps were collected on day 14<sup>th</sup> (47% of survival) and immediately fixed in 10% (v/v)  
332 phosphate buffered formalin for 24 hours. After that, the shrimps were preserved in 70% ethanol  
333 until further processing. The preserved samples were sent to the Veterinary Histopathology Lab  
334 (VHL) of the Universiti Putra Malaysia (UPM) for tissue embedding and hematoxylin and eosin  
335 (H&E) staining. The hepatopancreases of five challenged and unchallenged shrimps were  
336 pulled together and screened for the presence of *pirA* and *pirB* genes using specific primers as  
337 mentioned earlier.

338

### 339 **Statistical analysis**

340 The mortality data of shrimp challenged with the test bacteria, *Algoriphagus* sp. strain NBP  
341 colony count and conjugation efficiency (n<sup>o</sup>) were subjected to one-way ANOVA followed by  
342 Tukey's post-hoc test, after prior confirmation of normality and homoscedasticity. All data are  
343 presented as mean ± standard deviation and statistical analyses were performed using SPSS  
344 version 22.

345

### 346 **Acknowledgements**

347 This study was funded by Universiti Putra Malaysia High Impact Grant (vot no: 9598400). It  
348 was also supported by 'Higher Institution Centre of Excellence' (HICoE) grant awarded to the



349 Institute of Bioscience (IBS), Universiti Putra Malaysia (UPM) and Japan Science and  
350 Technology Agency (JST/Japan International Cooperation Agency (JICA) through their  
351 Science and Technology Research Partnership for Sustainable Development (SATREPS-  
352 COSMOS) program with matching funds from Ministry of Education (MOE), Malaysia.

353

## 354 **References**

355

356

357 1. Restrepo L, Bayot B, Betancourt I, Pinzon A. Draft genome sequence of pathogenic bacteria  
358 *Vibrio parahaemolyticus* strain Ba94C2, associated with acute hepatopancreatic necrosis  
359 disease isolate from South America. *Genom Data*. 2016; 9:143-144. [doi:](#)  
360 [10.1016/j.gdata.2016.08.008](https://doi.org/10.1016/j.gdata.2016.08.008).

361

362 2. Dhar AK, Piamsomboon P, Aranguren Caro LF, Kanrar S, Adami R Jr, et al. First report  
363 of acute hepatopancreatic necrosis disease (AHPND) occurring in the USA. *Dis Aquat*  
364 *Org* 2019; 132:241-247. doi: [org/10.3354/dao03330](https://doi.org/10.3354/dao03330).

365

366 3. Kondo H, Van PT, Dang LT, Hirono I. Draft genome sequence of non-*Vibrio*  
367 *parahaemolyticus* acute hepatopancreatic necrosis disease strain KC13.17.5, isolated from  
368 diseased shrimp in Vietnam. *Genom Data*. 2015; 3: 00978–15. [doi:](#)  
369 [10.1128/genomeA.00978-15](https://doi.org/10.1128/genomeA.00978-15).

370

371 4. Xiao J, Liu L, Ke Y, Li X, Liu Y, Pan Y, et al. Shrimp AHPND-causing plasmids encoding  
372 the PirAB toxins as mediated by pirAB-Tn903 are prevalent in various *Vibrio* species. *Sci*

- 373 Rep. 2017; 7:42177. [doi](https://doi.org/10.1038/srep42177): 10.1038/srep42177. PubMed PMID: 28169338; PubMed Central  
374 PMCID: PMC5294582.
- 375
- 376 5. Dong X, Wang H, Xie G, Zou P, Guo C, Liang Y, et al. An isolate of *Vibrio campbellii*  
377 carrying the *pir*<sup>VP</sup> gene causes acute hepatopancreatic necrosis disease. Emerg Microbes  
378 Infect. 2017; 6: e2. [doi](https://doi.org/10.1038/emi.2016.131): 10.1038/emi.2016.131. PubMed PMID: 28050022; PubMed  
379 Central PMCID: PMC5285496.
- 380
- 381 6. Restrepo L, Bayot B, Arciniegas S, Bajaña L, Betancourt I, Panchana F, et al. PirVP genes  
382 causing AHPND identified in a new *Vibrio* species (*Vibrio punensis*) within the commensal  
383 Orientalis clade. Sci Rep. 2018; 8:13080. [doi](https://doi.org/10.1038/s41598-018-30903-x):10.1038/s41598-018-30903-x. PubMed  
384 PMID: 30166588; PubMed Central PMCID: PMC6117253.
- 385
- 386 7. Muthukrishnan S, Defoirdt T, Shariff M, Ina-Salwany MY, Yusoff FM, Ismail, SI, et al.  
387 *Vibrio parahaemolyticus* and *Vibrio harveyi* causing Acute Hepatopancreatic Necrosis  
388 Disease (AHPND) in *Penaeus vannamei* (Boone, 1931) isolated from Malaysian shrimp  
389 ponds. Aquaculture. 2019; 511:734227. doi: org/10.1016/j.aquaculture.2019.734227.
- 390
- 391 8. Lee CT, Chen IT, Yang YT, Ko TP, Huang YT, Huang JY, et al. The opportunistic marine  
392 pathogen *Vibrio parahaemolyticus* becomes virulent by acquiring a plasmid that expresses  
393 a deadly toxin. Proc Natl Acad Sci USA. 2015; 112: 10798–10803. [doi](https://doi.org/10.1073/pnas.1503129112):  
394 10.1073/pnas.1503129112.
- 395
- 396 9. Chonsin K, Matsuda S, Theethakaew C, Kodama T, Junjhon J, Suzuki Y, et al. Genetic  
397 diversity of *Vibrio parahaemolyticus* strains isolated from farmed Pacific white shrimp and

- 398 ambient pond water affected by acute hepatopancreatic necrosis disease outbreak in  
399 Thailand. FEMS Microbiol Lett. 2015; 363: fnv222. doi: 10.1093/femsle/fnv222.  
400
- 401 10. Han JE, Tang KF, Tran LH, Lightner DV. Photorhabdus insect-related (Pir) toxin-like  
402 genes in a plasmid of *Vibrio parahaemolyticus*, the causative agent of acute  
403 hepatopancreatic necrosis disease (AHPND) of shrimp. Dis. Aquat. Organ. 2015a; 113: 33–  
404 40. doi: 10.3354/dao02830.  
405
- 406 11. Le Roux F, Binesse J, Saulnier D, Mazel D. Construction of a *Vibrio splendidus* mutant  
407 lacking the metalloprotease gene *vsm* by use of a novel counterselectable suicide vector.  
408 Appl Environ Microbiol. 2007; 73 (3): 777-784. doi: 10.1128/AEM.02147-06.  
409
- 410 12. Luo P, He X, Liu Q, Hu C. Developing universal genetic tool for rapid and efficient deletion  
411 mutation in *Vibrio* species based on suicide T-Vectors carrying a novel counter selectable  
412 marker, *vmi480* PLoS One 2015; 10(12): e0144465. doi:  
413 org/10.1371/journal.pone.0144465.  
414
- 415 13. Dong X, Song J, Chen J, Bi D, Wang W, Ren Y, et al. Conjugative transfer of the pVA1-  
416 type plasmid carrying the *pirABvp* genes results in the formation of new AHPND-causing  
417 *Vibrio*. Front. Cell. Infect. Microbiol. 2019; 9: 195. doi.org/10.3389/fcimb.2019.00195.  
418
- 419 14. Durán-Avelar MdeJ, Vázquez-Reyes A, González-Mercado A L, Zambrano-Zaragoza J F,  
420 Ayón-Pérez MF, Agraz-Cibrián JM, et al. pir A- and pirB -like gene identification in  
421 *Micrococcus luteus* strain in Mexico. J Fish Dis. 2018; doi: 10.1111/jfd.12874.  
422

- 423 15. Han JE, Tang KFJ, Lightner DV. Genotyping of virulence plasmid from *Vibrio*  
424 *parahaemolyticus* isolates causing acute hepatopancreatic necrosis disease in shrimp. Dis.  
425 Aquat. Organ. 2015b; 115:245–251. doi: 10.3354/dao02906.
- 426
- 427 16. Sirikharin R, Taengchaiyaphum S, Sanguanrut P, Chi TD, Mavichak R, Proespraiwong P,  
428 et al. Characterization and PCR Detection of Binary, Pir-Like Toxins from *Vibrio*  
429 *parahaemolyticus* Isolates that Cause Acute Hepatopancreatic Necrosis Disease (AHPND)  
430 in shrimp. PLoS One. 2015; 10(5): e0126987. doi: org/10.1371/journal.pone.0126987.
- 431
- 432 17. Dangtip S, Sirikharin R, Sanguanrut P, Thitamadee S, Sritunyalucksana K,  
433 Taengchaiyaphum S, et al. AP4 method for two-tube nested PCR detection of AHPND  
434 isolates of *Vibrio parahaemolyticus*. Aquacult Rep. 2015; 2: 158–162.
- 435
- 436 18. Jiang H, Dong H, Zhang G, Yu B, Chapman LR, Fields MW. Microbial diversity in water  
437 and sediment of Lake Chaka, an Anthalassohaline lake in Northenwestern China. Appl.  
438 Environ. Microbiol. 2006; 72: 3832-3845. doi:[10.1128/AEM.02869-05](https://doi.org/10.1128/AEM.02869-05).
- 439
- 440 19. Kim YB, Okuda J, Matsumoto C, Takahashi N, Hashimoto S, Nishibuchi M. Identification  
441 of *Vibrio parahaemolyticus* strains at the species level by PCR targeted to the toxR gene. J  
442 Clin Microbiol. 1999; 37: 1173–1177.
- 443
- 444 20. Ronquist F, Teslenko M, van der Mark P, Ayres DL, Darling A, Höhna S, et al. MrBayes  
445 3.2: Efficient bayesian phylogenetic inference and model choice across a large model space.  
446 Syst. Biol. 2012; 61: 539–542. doi: 10.1093/sysbio/sys029.
- 447

- 448 21. Drummond AJ, Rambaut A. Beast: Bayesian evolutionary analysis by sampling trees.  
449 BMC Evol Biol. 2007; 7: 214.  
450
- 451 22. Hall TA. BioEdit: A User-Friendly Biological Sequence Alignment Editor and Analysis  
452 Program for Windows 95/98/NT. Nucleic Acids Symposium Series, 1999; 41: 95-98.  
453
- 454 23. Katoh K, Kumar KI, Toh H, Miyata T. MAFFT version 5: Improvement in accuracy of  
455 multiple sequence alignment, Nucleic Acids Res. 2005; 33: 511–518. [https://doi:  
456 org/10.1093/nar/gki198](https://doi.org/10.1093/nar/gki198).  
457
- 458 24. Tran L, Nunan L, Redman RM, Mohny LL, Pantoja CR, Fitzsimmons K, et al.  
459 Determination of the infectious nature of the agent of acute hepatopancreatic necrosis  
460 syndrome affecting penaeid shrimp. Dis. Aquat. Organ. 2013; 105: 45–55. [doi:  
461 10.3354/dao02621](https://doi.org/10.3354/dao02621).  
462

## 463 **Figures**

464

465 **Fig 1. Pictures of *Vibrio parahaemolyticus* BpShHep31 (left) and strain NBP isolated from**  
466 **a microalgal culture (right) on Marine Agar plates showing the clearly distinct colony**  
467 **morphologies.**

468

469 **Fig 2. Phylogenetic reconstruction of *Algoriphagus* sp. strain NBP based on 16S rDNA**  
470 **sequences using mixed model method. Percentage bootstrap values (10,000,000 replicates)**  
471 **> 65% are presented.**

472

473 **Fig 3. Gel electrophoresis of PCR products**

474 (A) Gel electrophoresis of PCR products after amplification of the *pirA* gene from *Algoriphagus*  
475 sp. strain NBP colonies picked up after co-culture with *V. parahaemolyticus* BpShHep31. Lanes  
476 1-3: triplicates at 20 °C, lanes 4-6: triplicates at 30 °C, lanes: 7-9: triplicates at 40 °C, lanes 10-  
477 11: positive control (*V. parahaemolyticus*, BpShHep31), lanes 12-13: negative control, M: 100  
478 kb ladder. (B) Gel electrophoresis of PCR products after amplification of the *pirB* gene from  
479 *Algoriphagus* sp. strain NBP colonies picked up after co-culture with *V. parahaemolyticus*  
480 BpShHep31. Lane 1: negative control, lane 2: positive control, lanes 3-5: triplicates at 20 °C,  
481 lanes 6-8: triplicates at 30 °C and lanes 9-11: triplicates at 40 °C.

482

483 **Fig 4. Number of *Algoriphagus* sp. strain NBP colonies**

484 (A) Number of *Algoriphagus* sp. strain NBP colonies formed at  $10^8$  CFU mL<sup>-1</sup> upon co-culture.  
485 (B) Plate picture of the co-culture at different dilutions (from  $10^{-6}$  to  $10^{-9}$ ).

486

487 **Fig 5. Survival of *P. vannamei***

488 Survival of *P. vannamei* without inoculation of any bacteria (Unchallenged), challenged with  
489 non-*PirAB* *Algoriphagus* sp. strain NBP (NBP *pirAB*+), and *pirAB* positive *Algoriphagus* sp.  
490 strain NBP (NBP *pirAB*-). The bacteria were inoculated to rearing water at the start of the  
491 experiment at  $10^6$  CFU/mL. Error bars represent the standard deviation of triplicate shrimp  
492 cultures.

493

494 **Fig 6. Photomicrographs of shrimp hepatopancreas**

495 Photomicrographs of shrimp hepatopancreas challenged with *pirA* and *pirB* positive  
496 *Algoriphagus* sp. strain NBP at  $10^6$  CFU mL<sup>-1</sup> (at 14<sup>th</sup> day of challenge). (A) Histological

497 sections show tubule atrophy and detachment of epithelial cells. (B) Sloughing of cells to lumen  
498 and degeneration of cells were observed. (C) Hemocytic infiltration and massive sloughing of  
499 hepatopancreas recorded. (D) Histological sections show severe necrosis, melanized hemocytic  
500 nodules, tubule atrophy, elongated lumen and karyomegaly. Scale bars: 50  $\mu\text{m}$ , magnification:  
501 20 x.

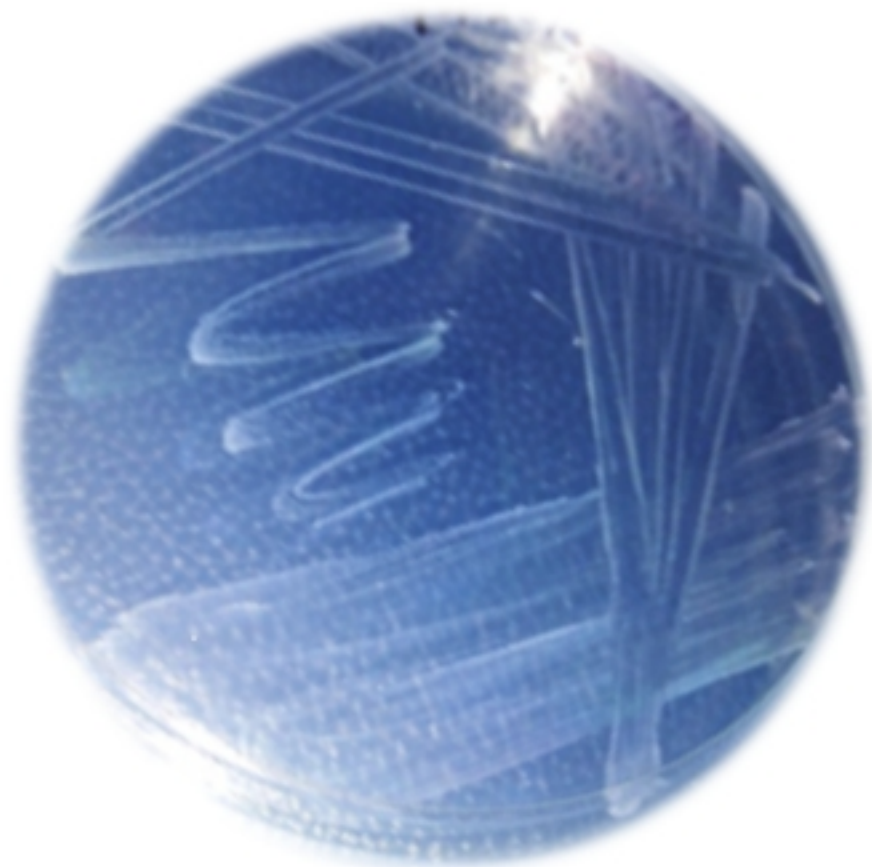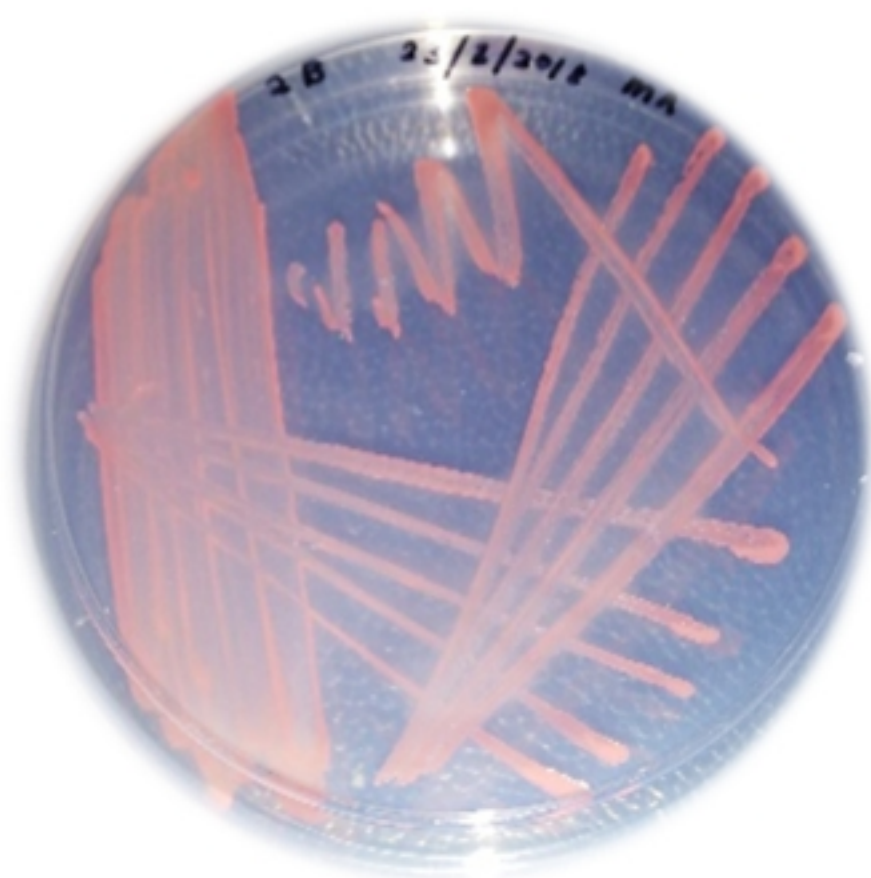

Figure 1



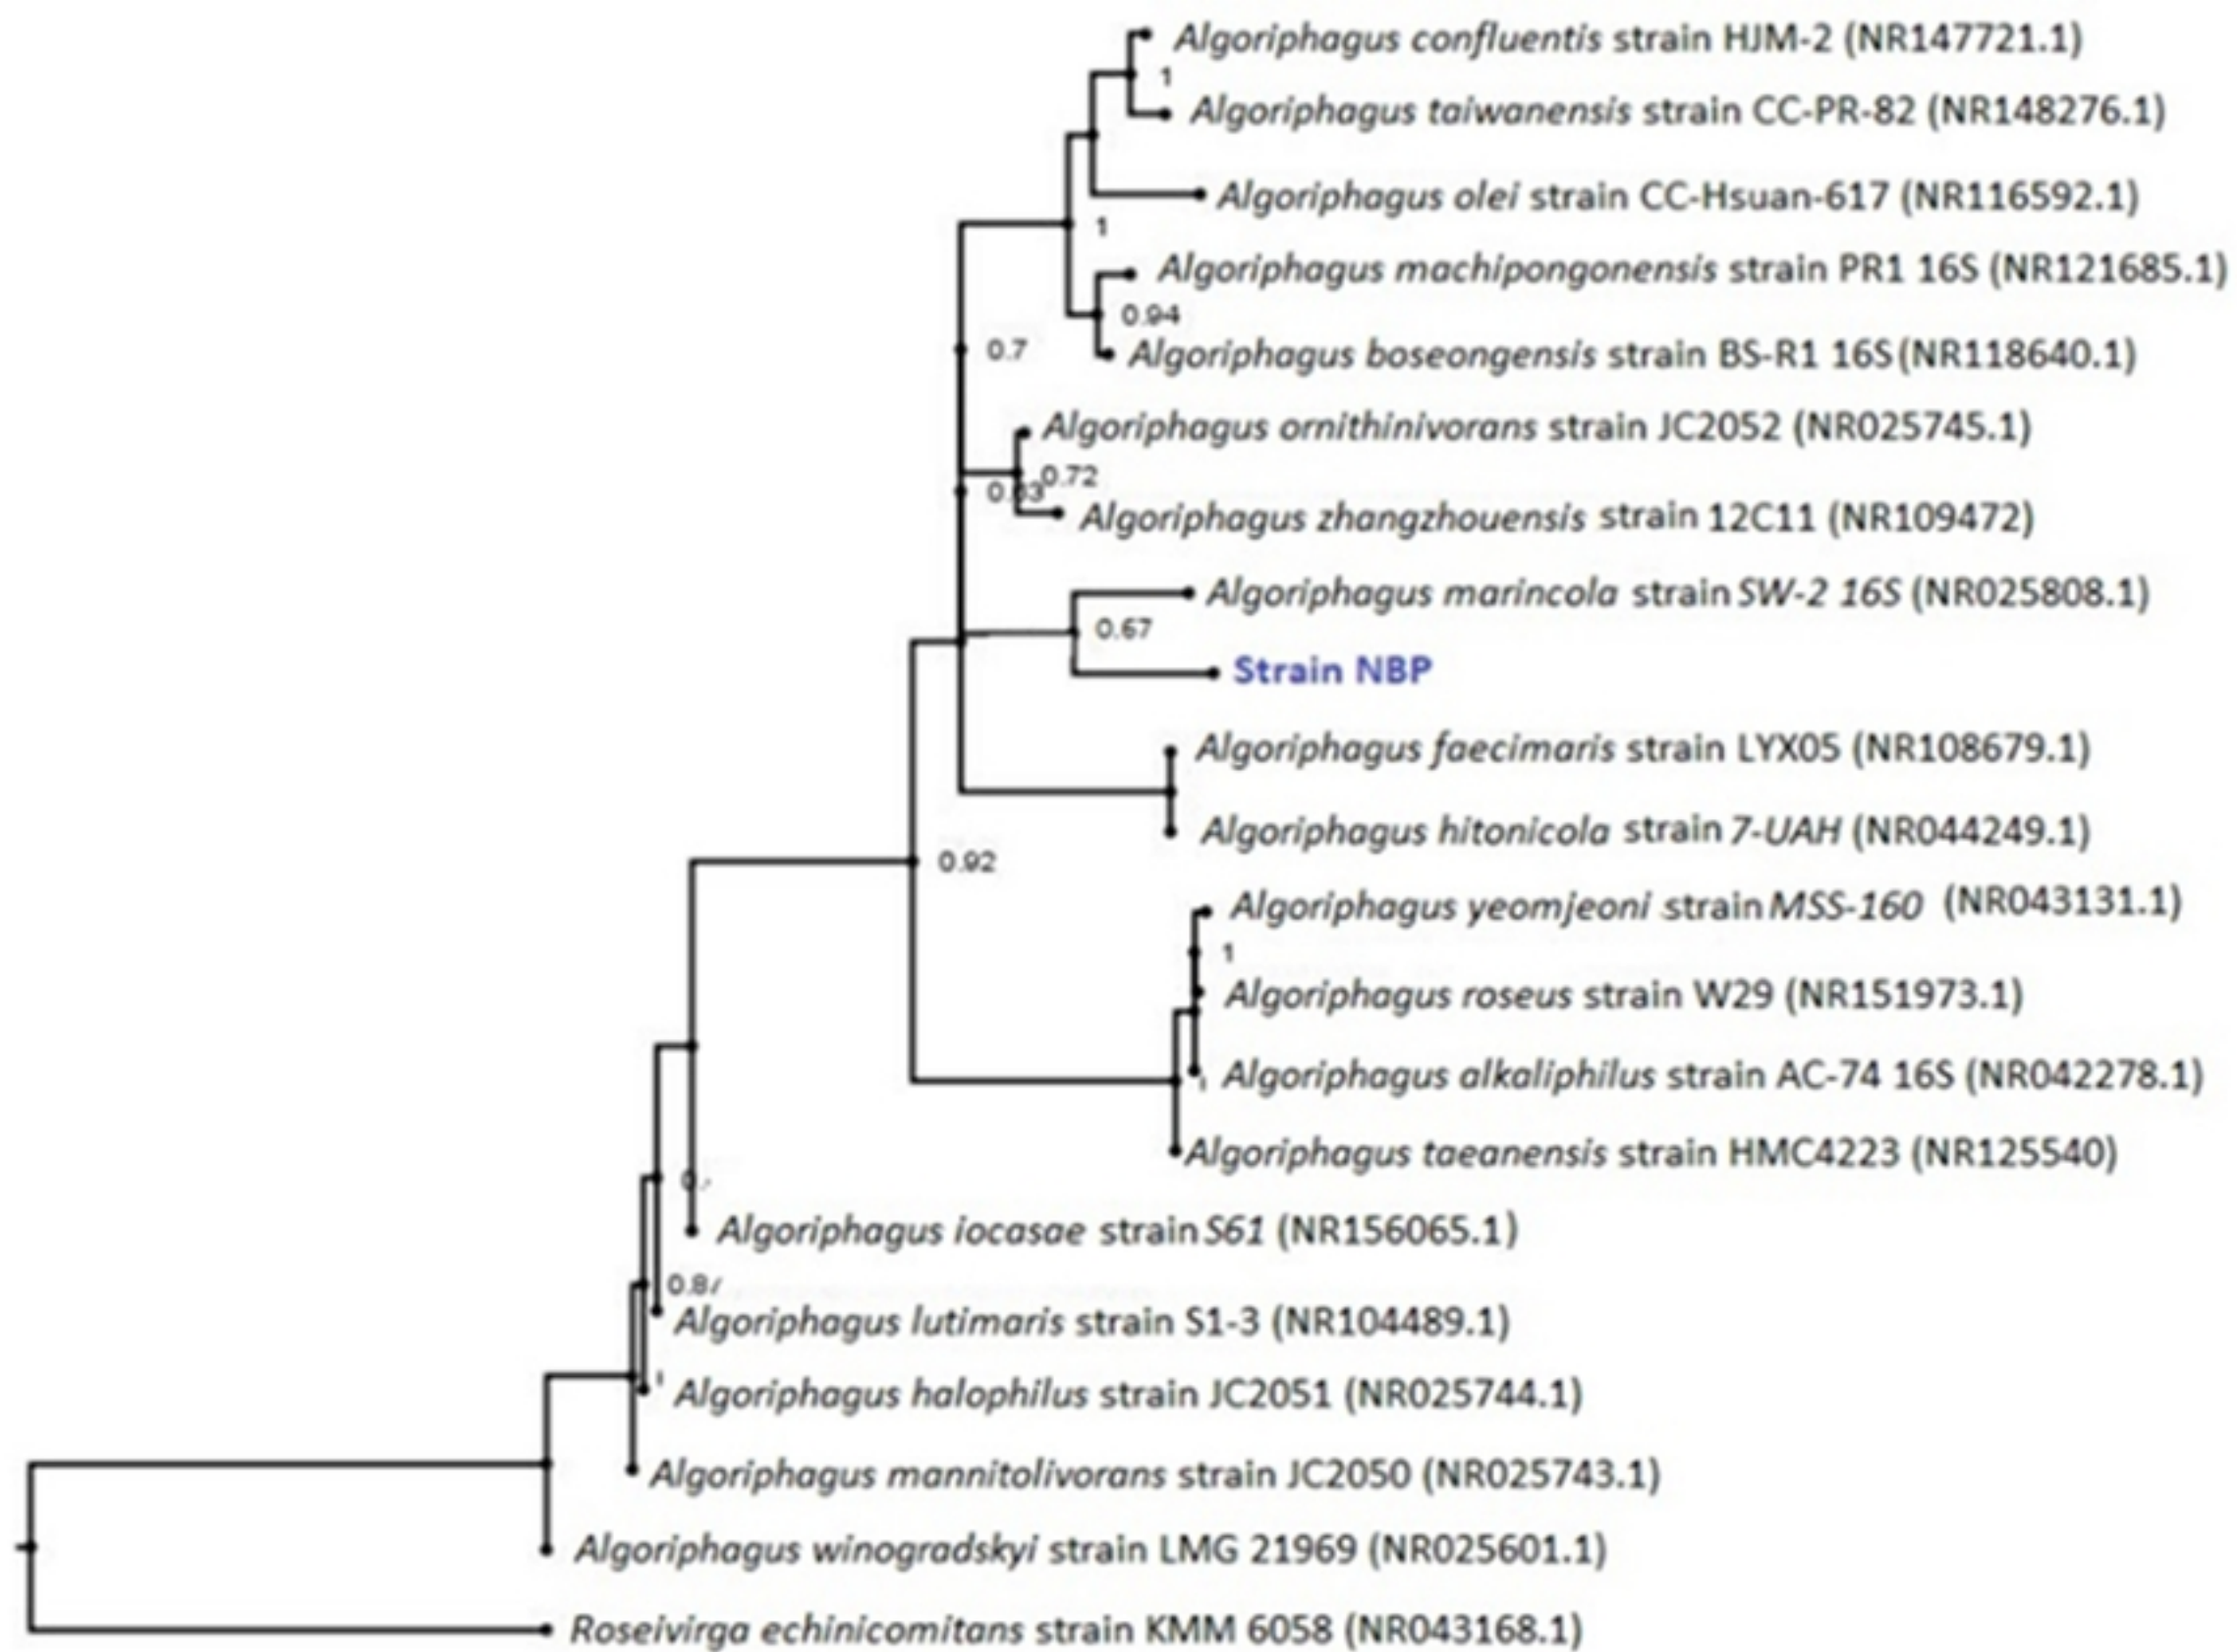

Figure2

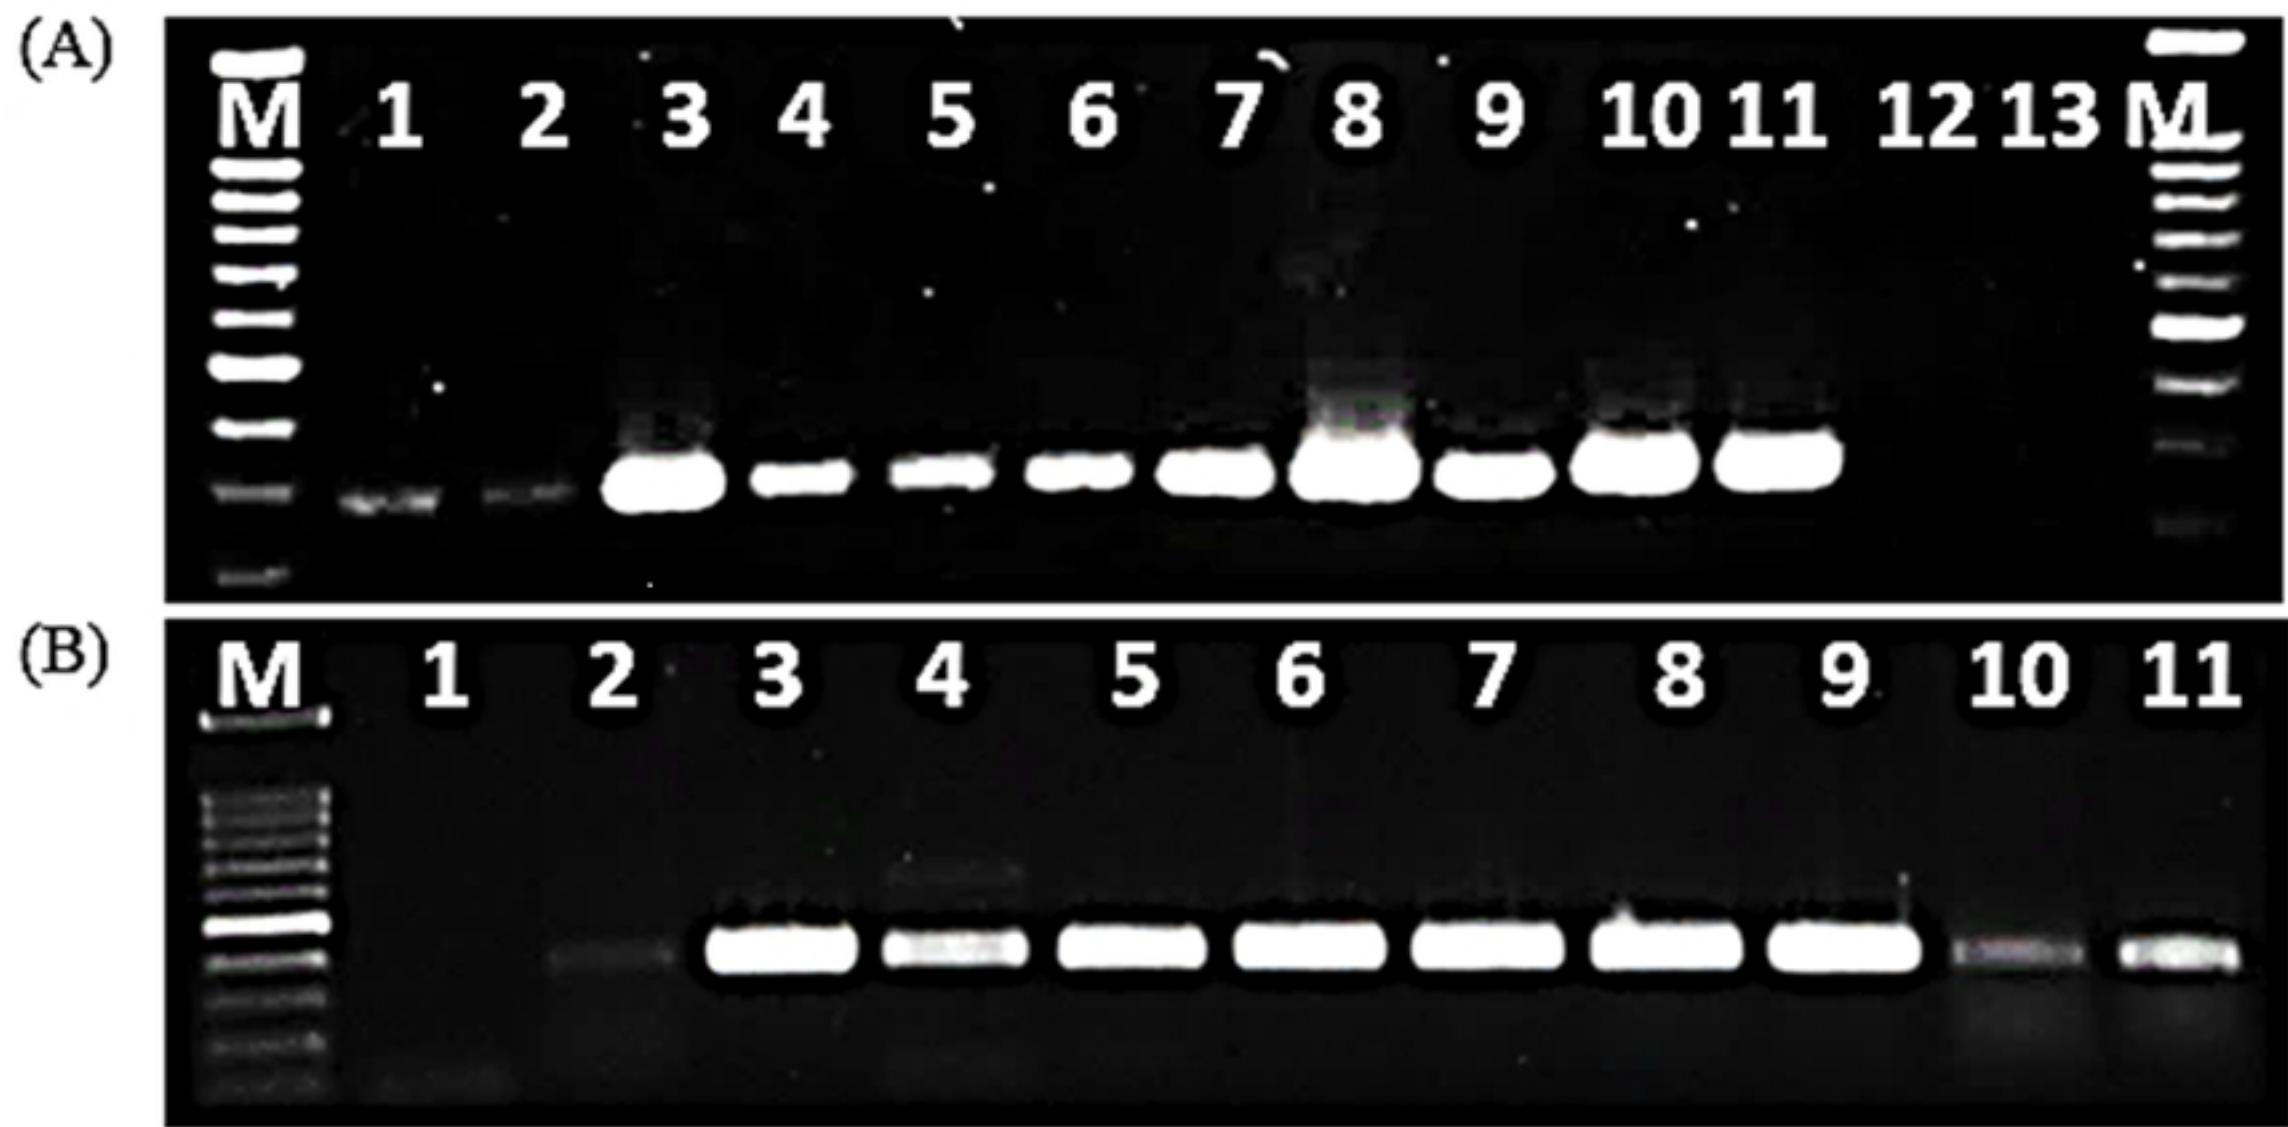

Figure3

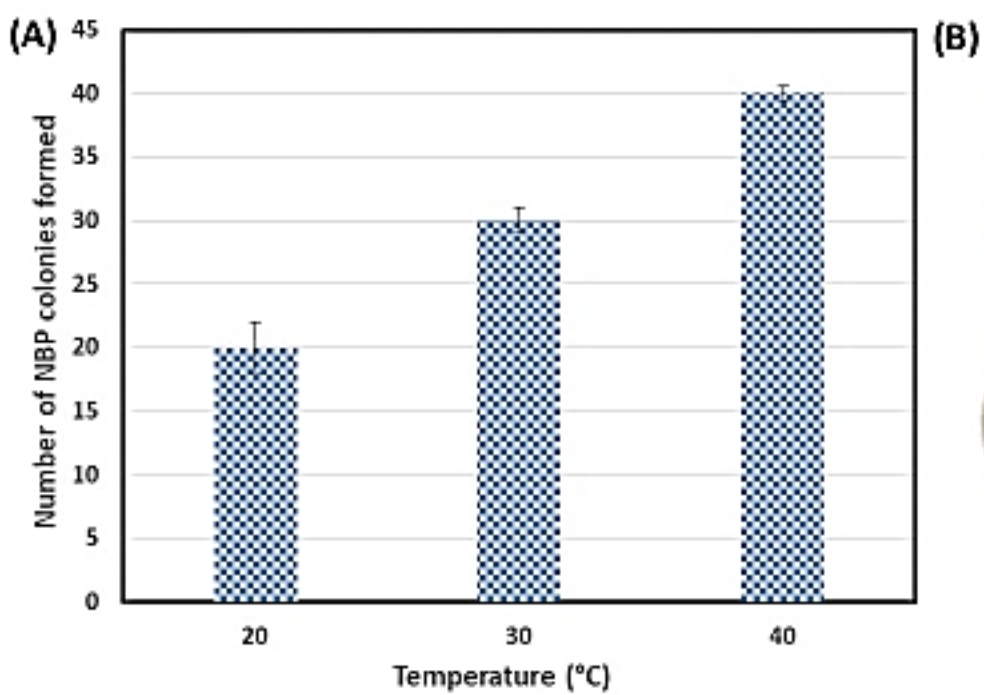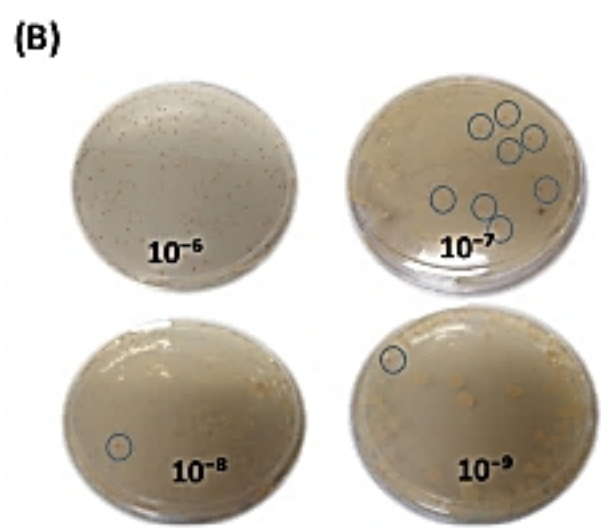

Figure4

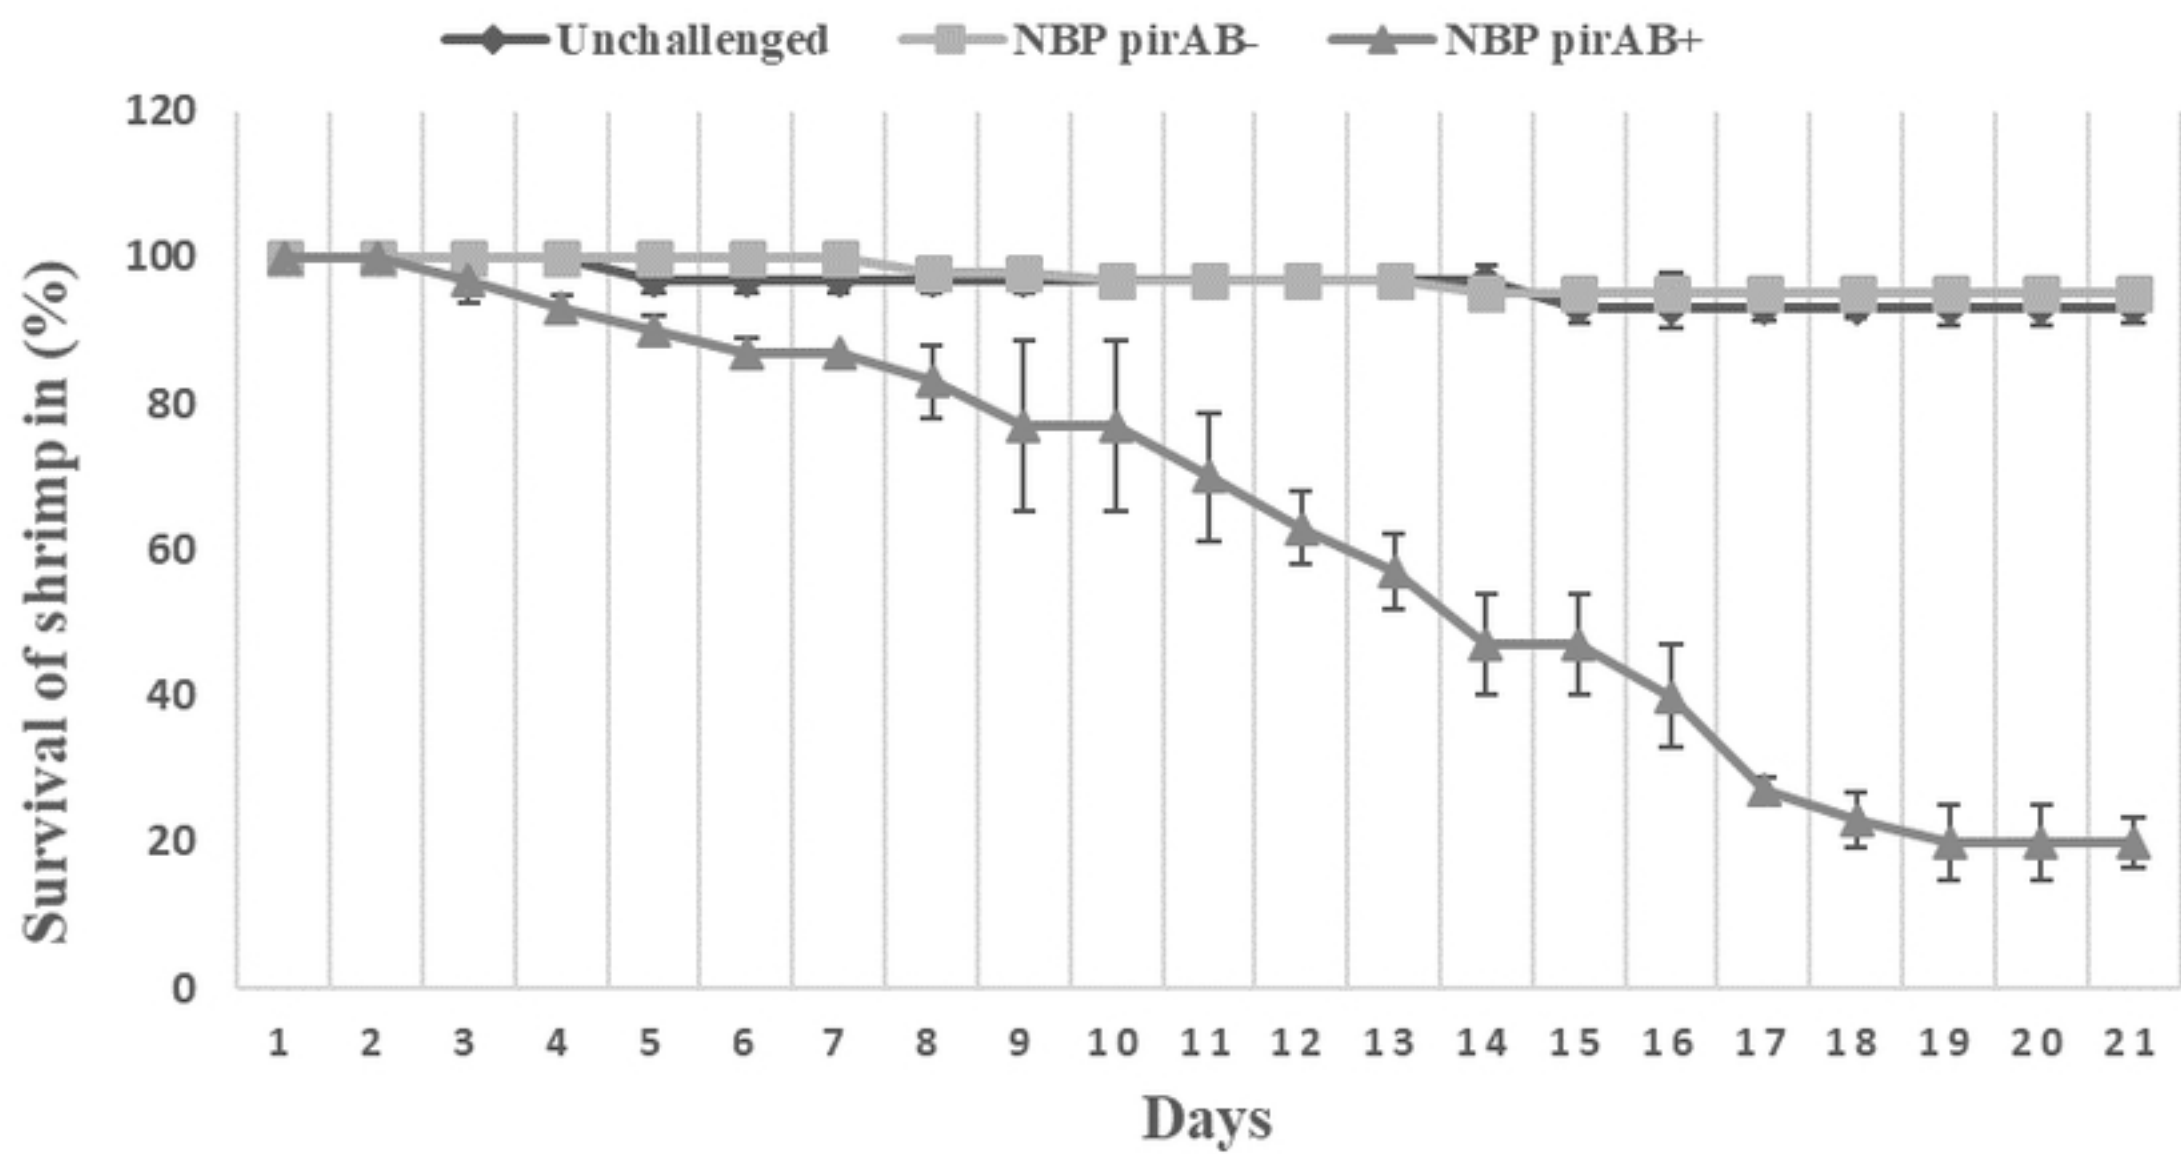

Figure5

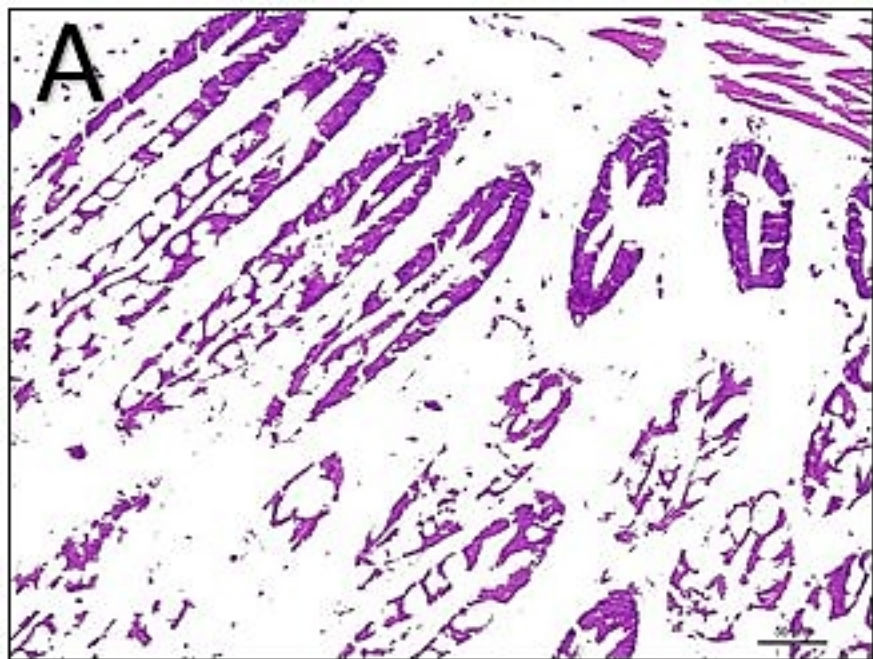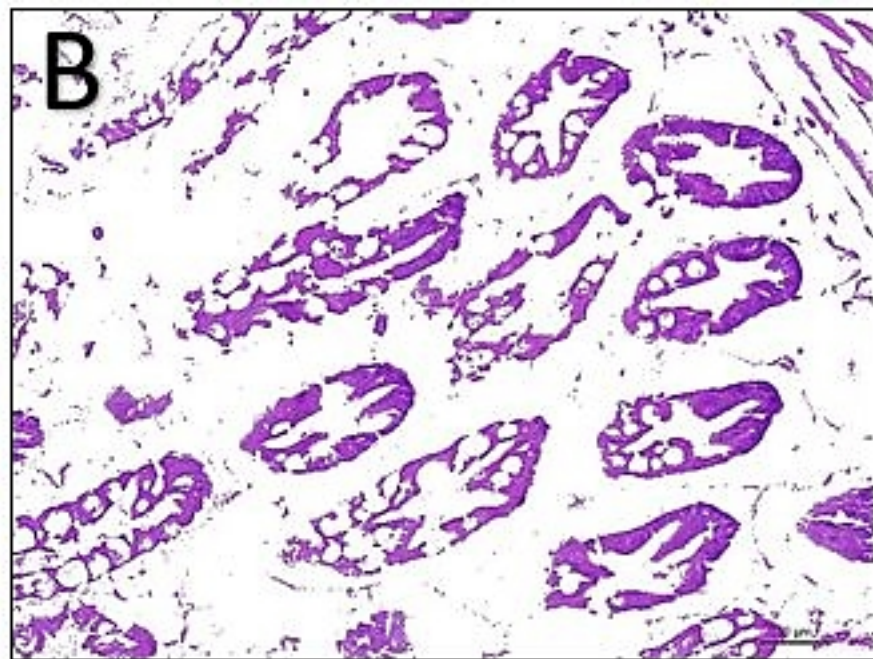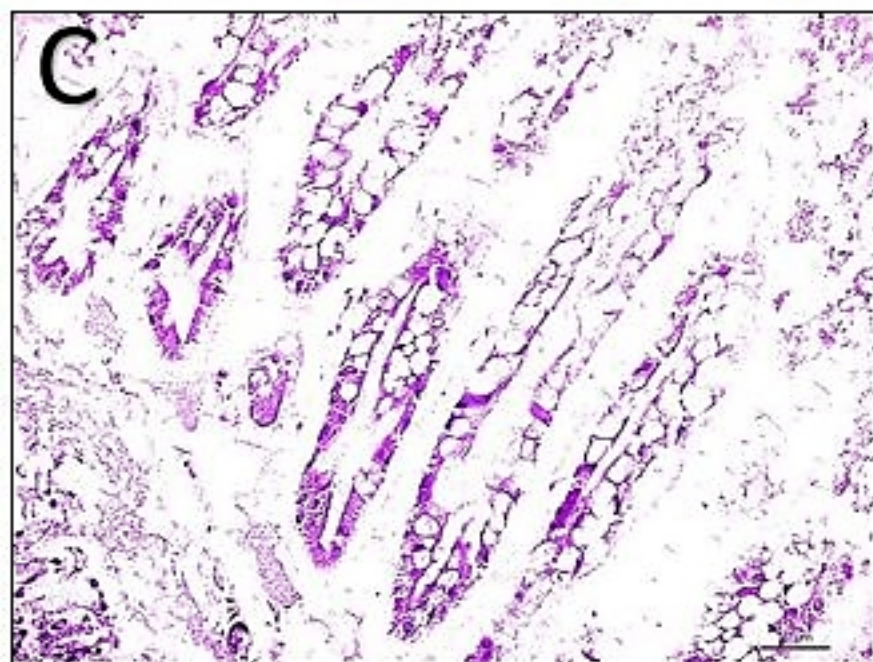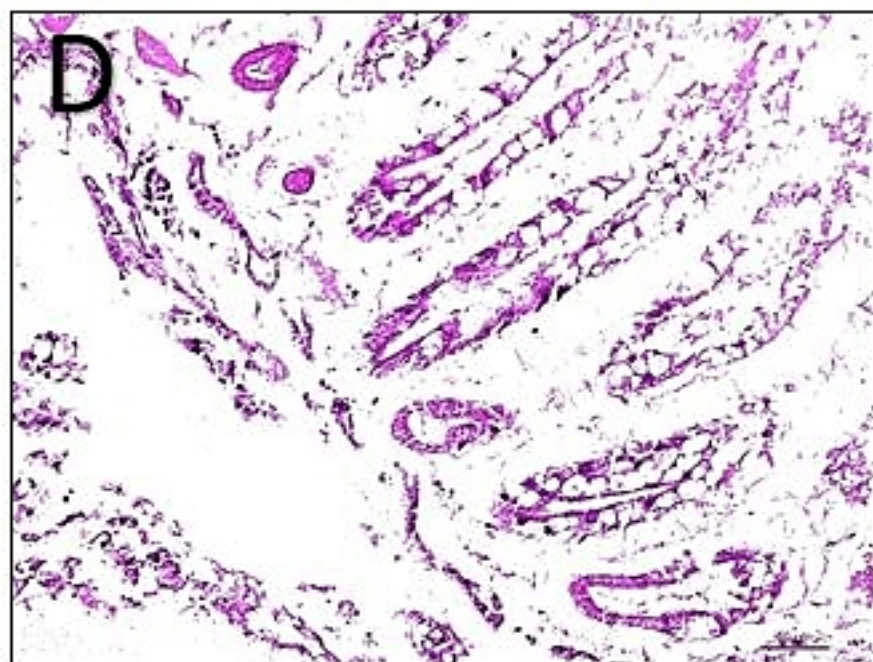

Figure6
